# Supplementary material for: Exploring excited state properties of 7-hydroxy and 7-methoxy 4-methycoumarin: a combined time-dependent density functional theory/effective fragment potential study
Source: Royal Society of Chemistry journal article supplement (doi:10.1039/c5nj02917a), 2015-12-15
Supplement: c5nj02917a1.pdf [file c5nj02917a1.pdf]

## Electronic Supplementary Information

### Exploring excited state properties of 7-hydroxy and 7-methoxy 4-Methycoumarin: A combined time-dependent density functional theory / effective fragment potential study

Mariyappa Ramegowda,<sup>\*a</sup> Keremegaladoddi N Ranjitha,<sup>a</sup> Thalashasana N Deepika<sup>a</sup>

*PG Department of Physics, Govt. College, (Autonomous), Mandya - 571401, INDIA.  
E-mail: hmrgowda@yahoo.com.*

#### EQUILIBRIUM GEOMETRY OF 4-METHYLUMBELLIFERONE WITH FIVE WATER MOLECULES

##### (4MU-(H<sub>2</sub>O)<sub>5</sub>) IN S<sub>0</sub> STATE

|   |     |               |               |               |
|---|-----|---------------|---------------|---------------|
| O | 8.0 | -4.1916045940 | 3.1786721510  | 3.3456310406  |
| C | 6.0 | -3.5903553628 | 4.3708406348  | 3.6795130110  |
| C | 6.0 | -2.9922452211 | 5.1269577105  | 2.6082661854  |
| C | 6.0 | -3.0478290326 | 4.7081734961  | 1.3077818157  |
| C | 6.0 | -3.7259939714 | 3.4703277482  | 0.9913330996  |
| C | 6.0 | -3.8892214570 | 2.9245269377  | -0.3033546256 |
| C | 6.0 | -4.5755563257 | 1.7420098744  | -0.5148217741 |
| C | 6.0 | -5.1296864331 | 1.0450703354  | 0.5830840872  |
| C | 6.0 | -4.9657443871 | 1.5424514263  | 1.8773596117  |
| C | 6.0 | -4.2849595129 | 2.7371852933  | 2.0546472763  |
| O | 8.0 | -3.6324630683 | 4.6598966612  | 4.8722311473  |
| O | 8.0 | -5.8134330888 | -0.0937305901 | 0.3540785048  |
| C | 6.0 | -2.4155110055 | 5.5251966436  | 0.2139544144  |
| H | 1.0 | -2.5043158363 | 6.0515918686  | 2.8912888281  |
| H | 1.0 | -3.4727291052 | 3.4501161082  | -1.1566055912 |
| H | 1.0 | -4.7011595092 | 1.3380023515  | -1.5129359477 |

H 1.0 -5.3500412682 1.0280082675 2.7435094517  
H 1.0 -6.2054152982 -0.4229683363 1.1820796913  
H 1.0 -3.1640662697 5.8444228226 -0.5205086800  
H 1.0 -1.6649523468 4.9377927342 -0.3269138467  
H 1.0 -1.9313683499 6.4160202246 0.6185682770

FRAGNAME=H2ODFT

O1 -2.3334093249 7.0727699161 5.2195985572  
H2 -2.8610108402 6.2914003940 5.2640593836  
H3 -1.6174787026 6.9513610222 5.8225759022

FRAGNAME=H2ODFT

O1 -5.8887339168 -0.8288074043 -2.3210204039  
H2 -5.8384682118 -0.7654494993 -1.3806281512  
H3 -6.7991645064 -0.7335312317 -2.5510574585

FRAGNAME=H2ODFT

O1 -6.9987045217 -0.8240023191 2.5541293271  
H2 -6.7136850407 -0.4314986727 3.3638102748  
H3 -7.9340324675 -0.7054184535 2.5096551243

FRAGNAME=H2ODFT

O1 -6.0486961545 0.2540166767 4.8236394732  
H2 -5.5061086307 -0.3204159825 5.3398800692  
H3 -5.8738465728 1.1324681996 5.1213457040

FRAGNAME=H2ODFT

O1 -5.3346841201 2.6235126230 5.8859092293  
H2 -4.6900516465 3.1835048508 5.4837449184  
H3 -5.9079512983 3.1839421986 6.3840677252

# EQUILIBRIUM GEOMETRY OF 4-METHYLUMBELLIFERONE WITH FIVE WATER MOLECULES

(4MU-(H<sub>2</sub>O)<sub>5</sub>) IN S<sub>1</sub> STATE

|   |     |               |               |               |
|---|-----|---------------|---------------|---------------|
| O | 8.0 | -3.2667272130 | 2.8348883725  | 3.3081632068  |
| C | 6.0 | -3.4615417366 | 4.3023103777  | 3.6008233346  |
| C | 6.0 | -2.9816540323 | 5.1393224990  | 2.5468225528  |
| C | 6.0 | -2.7561746405 | 4.6621049112  | 1.2659473921  |
| C | 6.0 | -3.4668409162 | 3.3942430942  | 0.9804401994  |
| C | 6.0 | -3.9523793878 | 3.0139301052  | -0.2687070844 |
| C | 6.0 | -4.7762029018 | 1.8927053559  | -0.4180904916 |
| C | 6.0 | -5.1846663261 | 1.1379409210  | 0.7293877115  |
| C | 6.0 | -4.7080850030 | 1.4867755764  | 1.9904351833  |
| C | 6.0 | -3.8263735753 | 2.5599005284  | 2.1093268677  |
| O | 8.0 | -4.0174836671 | 4.5475533225  | 4.6697022027  |
| O | 8.0 | -6.0099058903 | 0.1053580642  | 0.5228151552  |
| C | 6.0 | -2.1190561666 | 5.4581701967  | 0.1732554829  |
| H | 1.0 | -2.8180307267 | 6.1818759352  | 2.8065967693  |
| H | 1.0 | -3.6955346262 | 3.5974779648  | -1.1464256573 |
| H | 1.0 | -5.1270421473 | 1.5787609671  | -1.3939171696 |
| H | 1.0 | -4.9653721115 | 0.9113790936  | 2.8701505049  |
| H | 1.0 | -6.3331406086 | -0.2720292839 | 1.3679390796  |
| H | 1.0 | -2.8431273509 | 5.7953227617  | -0.5860633371 |
| H | 1.0 | -1.3541095824 | 4.8788967894  | -0.3628759892 |
| H | 1.0 | -1.6362545673 | 6.3504177156  | 0.5800603884  |

FRAGNAME=H2ODFT

|    |               |              |              |
|----|---------------|--------------|--------------|
| O1 | -3.9736476951 | 7.3015565490 | 4.9343751169 |
| H2 | -4.1691269678 | 6.3783271172 | 4.9166628523 |
| H3 | -3.4788502077 | 7.4590130948 | 5.7225764469 |

FRAGNAME=H2ODFT

|    |               |               |               |
|----|---------------|---------------|---------------|
| O1 | -6.2713874505 | -0.3831402015 | -2.1949599150 |
| H2 | -6.2631523205 | -0.4763502076 | -1.2557461313 |
| H3 | -7.1750694564 | -0.4264602088 | -2.4639592891 |

FRAGNAME=H2ODFT

|    |               |               |              |
|----|---------------|---------------|--------------|
| O1 | -7.0521943991 | -0.8117343201 | 2.6338261208 |
| H2 | -6.8226627739 | -0.4411204212 | 3.4709874106 |
| H3 | -7.9916079677 | -0.7562815919 | 2.5609865975 |

FRAGNAME=H2ODFT

|    |               |               |              |
|----|---------------|---------------|--------------|
| O1 | -6.5524154820 | 0.2053475755  | 4.9978271924 |
| H2 | -6.4714311967 | -0.3932863799 | 5.7230563887 |
| H3 | -5.9606639446 | 0.9204797112  | 5.1689838469 |

FRAGNAME=H2ODFT

|    |               |              |              |
|----|---------------|--------------|--------------|
| O1 | -4.7300295265 | 2.0479641654 | 5.4559215719 |
| H2 | -3.9800538002 | 1.9760434743 | 4.8873775735 |
| H3 | -4.9065294824 | 2.9696670890 | 5.5568668057 |

EQUILIBRIUM GEOMETRY OF CATIONIC FORM OF 4-METHYLUMBELLIFERONE WITH FIVE WATER MOLECULES (4-MU<sup>+</sup>-(H<sub>2</sub>O)<sub>5</sub>) IN S<sub>0</sub> STATE

|   |     |               |              |              |
|---|-----|---------------|--------------|--------------|
| O | 8.0 | -4.5226440098 | 2.7126074865 | 3.1452559944 |
| C | 6.0 | -3.9032129340 | 3.8424039912 | 3.5911435045 |
| C | 6.0 | -3.2794365094 | 4.6803108481 | 2.6093750140 |

C 6.0 -3.3042558994 4.3655048858 1.2796496801  
C 6.0 -3.9642807650 3.1819630223 0.8442446082  
C 6.0 -4.0700498864 2.7309166516 -0.4954599880  
C 6.0 -4.7063461671 1.5654961817 -0.8201085069  
C 6.0 -5.3073538258 0.7143984437 0.1834974326  
C 6.0 -5.2143574642 1.1868184700 1.5272429966  
C 6.0 -4.5674285047 2.3578323573 1.8194192349  
O 8.0 -3.9395219356 4.0292496950 4.7997667803  
O 8.0 -5.8776299128 -0.3785955069 -0.1122269676  
C 6.0 -2.6266528590 5.2637601488 0.2823404094  
H 1.0 -2.7842091126 5.5681452595 2.9817955501  
H 1.0 -3.6289293111 3.3323847177 -1.2858686871  
H 1.0 -4.7721743930 1.2365748213 -1.8524921441  
H 1.0 -5.6476628390 0.6200868259 2.3372864146  
H 1.0 -3.3419899894 5.6407913547 -0.4546442070  
H 1.0 -1.8556763883 4.7172251872 -0.2690127515  
H 1.0 -2.1577081184 6.1159991147 0.7771115504

FRAGNAME=H2ODFT

O1 -2.6509748336 5.6125462956 6.6059427664  
H2 -2.7176760448 4.9811346296 7.3043328512  
H3 -3.0844157386 5.2355139484 5.8570408735

FRAGNAME=H2ODFT

O1 -6.2576877200 -1.8993243259 2.0638627411  
H2 -5.5510769192 -2.5098313839 1.9265282502  
H3 -6.2810676799 -1.3365956384 1.3064538318



FRAGNAME=H2ODFT

O1 -6.5273236030 -0.9831728431 -2.6601214790  
H2 -7.3649970130 -0.5483234818 -2.6507542380  
H3 -6.1506258419 -0.8648166152 -1.8028181172

FRAGNAME=H2ODFT

O1 -5.1452606260 1.6078513151 5.8501211845  
H2 -5.3026078064 0.9411627058 5.2007779647  
H3 -4.7980456895 2.3563610993 5.3918054147

FRAGNAME=H2ODFT

O1 -6.1476891428 -0.6604447721 4.4758147476  
H2 -6.1715840371 -1.0898699602 3.6356353049  
H3 -7.0422862142 -0.5838225754 4.7668535300

EQUILIBRIUM GEOMETRY OF CATIONIC FORM OF 4-METHYLUMBELLIFERONE WITH FIVE WATER MOLECULES (4-MU<sup>+</sup>-(H<sub>2</sub>O)<sub>5</sub>) IN S<sub>1</sub> STATE

O 8.0 -4.4986951316 2.6465243961 3.1568370368  
C 6.0 -3.8877149384 3.8428162880 3.6317942557  
C 6.0 -3.2933544014 4.6826751919 2.6478544702  
C 6.0 -3.2812996186 4.4260699843 1.2926404254  
C 6.0 -3.9538803408 3.1585265632 0.8544455079  
C 6.0 -4.0603999068 2.7001120855 -0.4850618340  
C 6.0 -4.6854506763 1.5139514418 -0.8477752869  
C 6.0 -5.2654092659 0.6735123390 0.1542641695  
C 6.0 -5.1598959179 1.1343200443 1.5175946939  
C 6.0 -4.5149383643 2.3545827595 1.8379869620  
O 8.0 -3.9543653439 3.9971938464 4.8653923618

O 8.0 -5.8645290690 -0.4358122510 -0.0893047112  
C 6.0 -2.6441117390 5.3090218481 0.2802904095  
H 1.0 -2.8251966835 5.5815286912 3.0419924413  
H 1.0 -3.6229880155 3.3168729706 -1.2669332591  
H 1.0 -4.7347519550 1.1979057312 -1.8847083691  
H 1.0 -5.5789054057 0.5499577923 2.3247875770  
H 1.0 -3.3639349793 5.6703738843 -0.4785468359  
H 1.0 -1.8556033256 4.7876887816 -0.2951928421  
H 1.0 -2.1873395582 6.1851566470 0.7516358583

FRAGNAME=H2ODFT

O1 -2.5688540179 5.6401775134 6.5233522209  
H2 -2.4693084995 4.9909570215 7.2012031608  
H3 -3.0727058623 5.2377041332 5.8341302312

FRAGNAME=H2ODFT

O1 -6.4162978215 -1.9470024673 2.0758724423  
H2 -5.7911029925 -2.6410363395 1.9404956932  
H3 -6.3759909004 -1.3929212532 1.3128207964

FRAGNAME=H2ODFT

O1 -6.6179281535 -0.8962491921 -2.6673420101  
H2 -7.2055483041 -0.1595767384 -2.7211445061  
H3 -6.2445826091 -0.8827176431 -1.8005614983

FRAGNAME=H2ODFT

O1 -5.3109711964 1.7142460351 5.8365789338  
H2 -5.2890375408 1.0696530345 5.1474510556  
H3 -4.8820398986 2.4850545956 5.5007954339



FRAGNAME=H2ODFT

|    |               |               |              |
|----|---------------|---------------|--------------|
| O1 | -6.0818690699 | -0.6497740626 | 4.4333904359 |
| H2 | -6.2392939848 | -1.1283565692 | 3.6352334121 |
| H3 | -6.9242837297 | -0.5057122919 | 4.8339677709 |

EQUILIBRIUM GEOMETRY OF PHOTOTAUTOMER OF 4-METHYLUMBELLIFERONE WITH FIVE WATER MOLECULES (4-MUT-(H<sub>2</sub>O)<sub>5</sub>) IN S<sub>0</sub> STATE

|   |     |               |              |               |
|---|-----|---------------|--------------|---------------|
| O | 8.0 | -4.4555371706 | 2.0788348984 | 2.6634046597  |
| C | 6.0 | -4.0453293380 | 2.9621395815 | 3.5786708203  |
| C | 6.0 | -3.3271044039 | 4.0836637675 | 3.2406698235  |
| C | 6.0 | -3.0456162072 | 4.3406127564 | 1.8764244701  |
| C | 6.0 | -3.5085796418 | 3.4562965450 | 0.8948412633  |
| C | 6.0 | -3.3517468238 | 3.5850081445 | -0.5294446011 |
| C | 6.0 | -3.8874301912 | 2.6844486296 | -1.4027190505 |
| C | 6.0 | -4.6594084368 | 1.5261783015 | -0.9518421407 |
| C | 6.0 | -4.7364854292 | 1.3462356126 | 0.4746086827  |
| C | 6.0 | -4.2309979797 | 2.2891623400 | 1.3154984839  |
| O | 8.0 | -4.4125403534 | 2.6286377263 | 4.7980346454  |
| O | 8.0 | -5.2414158163 | 0.7436965222 | -1.7478490783 |
| C | 6.0 | -2.2607802205 | 5.5863039337 | 1.5611525642  |
| H | 1.0 | -3.0140661591 | 4.7562645934 | 4.0277975835  |
| H | 1.0 | -2.8016165175 | 4.4345570555 | -0.9207818984 |
| H | 1.0 | -3.7730098090 | 2.8153526617 | -2.4741445143 |
| H | 1.0 | -5.2345081760 | 0.4804261159 | 0.8824107725  |
| H | 1.0 | -5.0235543188 | 1.8540362252 | 4.7552394382  |
| H | 1.0 | -2.0671201119 | 5.7194897927 | 0.4976166851  |

H 1.0 -1.2984196148 5.5616201069 2.0847678497

H 1.0 -2.7967110280 6.4701627080 1.9255706867

FRAGNAME=H2ODFT

O1 -3.4318671377 4.6212861636 6.4719273097

H2 -3.8056463292 3.8163411009 6.1506314710

H3 -4.1195010283 5.0747163368 6.9328385427

FRAGNAME=H2ODFT

O1 -5.9909517289 0.6941865395 4.5609455936

H2 -6.4122582994 0.6450464049 3.7177584999

H3 -5.6116691037 -0.1544899694 4.7245650531

FRAGNAME=H2ODFT

O1 -7.2320379569 -0.4094438232 -0.2427984808

H2 -7.2883128151 -1.3225760988 -0.4749644595

H3 -6.6147821706 -0.0156311762 -0.8384370856

FRAGNAME=H2ODFT

O1 -7.4632942737 0.3796010782 2.3462885672

H2 -7.3144309098 0.1082668818 1.4546070619

H3 -8.2895612955 0.8357290913 2.3567048250

FRAGNAME=H2ODFT

O1 -4.8679198629 1.3098687226 -4.4045104237

H2 -4.9467263776 1.0038118119 -3.5151302155

H3 -5.7347631317 1.5575777505 -4.6839767704

EQUILIBRIUM GEOMETRY OF PHOTOTAUTOMER OF 4-METHYLUMBELLIFERONE WITH FIVE  
WATER MOLECULES (4-MUT-(H<sub>2</sub>O)<sub>5</sub>) IN S<sub>1</sub> STATE

O 8.0 -4.4328765300 2.0548433746 2.6432100205

C 6.0 -4.0143480308 2.9242007348 3.5958406572

C 6.0 -3.2702426931 4.0757631553 3.2669258950  
C 6.0 -2.9879690512 4.3845759356 1.9605937210  
C 6.0 -3.5252130071 3.4615661262 0.9102745013  
C 6.0 -3.4199885734 3.6211990251 -0.5019510981  
C 6.0 -3.9767977127 2.7490214297 -1.4189920136  
C 6.0 -4.7175175827 1.5959538776 -0.9813586379  
C 6.0 -4.7740971868 1.3916046901 0.4492316071  
C 6.0 -4.2090662558 2.3407256631 1.3380061593  
O 8.0 -4.3841665860 2.5747912451 4.8228828746  
O 8.0 -5.3084105645 0.7649784523 -1.7412918651  
C 6.0 -2.2021825992 5.5816258611 1.5546230576  
H 1.0 -2.9427211117 4.7009389862 4.0895171372  
H 1.0 -2.8799917109 4.4875037449 -0.8754884660  
H 1.0 -3.8800554335 2.9228054218 -2.4845627138  
H 1.0 -5.2542730112 0.5154495984 0.8563988584  
H 1.0 -5.0065850165 1.8167339139 4.7737270401  
H 1.0 -1.3157856879 5.2954246052 0.9674933839  
H 1.0 -1.8710936047 6.1567749575 2.4224089499  
H 1.0 -2.7920514693 6.2458227853 0.9038163159

FRAGNAME=H2ODFT

O1 -3.4297390584 4.5474347955 6.5243164036  
H2 -3.7851886623 3.7452991055 6.1763043809  
H3 -4.1485462000 5.0130429369 6.9210578885

FRAGNAME=H2ODFT

O1 -5.9950475058 0.6362254577 4.5558379873

H2 -6.4134551833 0.5892563657 3.7110851395

H3 -5.6281836558 -0.2168774224 4.7246717679

FRAGNAME=H2ODFT

O1 -7.1746031669 -0.5368290519 -0.2232736006

H2 -7.1776533211 -1.4549254517 -0.4422899269

H3 -6.6131402501 -0.1101411640 -0.8506293956

FRAGNAME=H2ODFT

O1 -7.4378548297 0.4078235228 2.2982947890

H2 -7.3307920835 0.0464198509 1.4329605135

H3 -8.2603611955 0.8708150356 2.2990637145

FRAGNAME=H2ODFT

O1 -4.9528612920 1.2810490497 -4.4213869345

H2 -5.0149781026 1.0040021810 -3.5212397308

H3 -5.8182680164 1.5533789610 -4.6817445250

#### EQUILIBRIUM GEOMETRY OF 7-METHOXY-4METHYL COUMARIN (MMC) IN $S_0$ STATE

O 8.0 -0.5272610210 1.6237753503 3.0585890802

C 6.0 0.3106630407 2.7369482296 3.2032387731

C 6.0 0.2027372014 3.7600899127 2.1723041102

C 6.0 -0.6526395393 3.6706979883 1.1179432126

C 6.0 -1.5047581536 2.4972347720 1.0130921987

C 6.0 -2.4372496075 2.2755107504 -0.0172364711

C 6.0 -3.2285167316 1.1314936179 -0.0614911795

C 6.0 -3.0972571223 0.1592034114 0.9507882293

C 6.0 -2.1777313570 0.3513335607 1.9892661631

|   |     |               |               |               |
|---|-----|---------------|---------------|---------------|
| C | 6.0 | -1.3970739969 | 1.5035721398  | 2.0159341388  |
| O | 8.0 | 1.0466511931  | 2.7588289706  | 4.1592738939  |
| O | 8.0 | -3.8134696581 | -0.9939335108 | 1.0073506574  |
| C | 6.0 | -4.7781829790 | -1.2467328487 | -0.0057735196 |
| C | 6.0 | -0.7228358204 | 4.7559215463  | 0.0781295719  |
| H | 1.0 | 0.8652442207  | 4.6165464385  | 2.3053892586  |
| H | 1.0 | -2.5478501260 | 3.0199387567  | -0.8070270833 |
| H | 1.0 | -3.9377848913 | 1.0013330005  | -0.8773564126 |
| H | 1.0 | -2.0733361924 | -0.3965077809 | 2.7752775398  |
| H | 1.0 | -5.2235418941 | -2.2192488062 | 0.2412740487  |
| H | 1.0 | -4.3142520849 | -1.3039167503 | -1.0064624728 |
| H | 1.0 | -5.5694875911 | -0.4762640495 | -0.0148268215 |
| H | 1.0 | -0.0188047623 | 5.5674956499  | 0.3074189171  |
| H | 1.0 | -1.7374184692 | 5.1845414622  | 0.0189935570  |
| H | 1.0 | -0.4815536581 | 4.3612581888  | -0.9232393899 |

EQUILIBRIUM GEOMETRY OF 7-METHOXY-4METHYL COUMARIN WITH TWO WATER MOLECULES (MMC-(H<sub>2</sub>O)<sub>2</sub>) IN S<sub>0</sub> STATE

|   |     |               |              |               |
|---|-----|---------------|--------------|---------------|
| O | 8.0 | -1.4051262439 | 1.0298838112 | 3.2893439493  |
| C | 6.0 | -0.3586326610 | 1.8770503128 | 3.6433950539  |
| C | 6.0 | 0.0136893148  | 2.9001158028 | 2.6795584841  |
| C | 6.0 | -0.6113832381 | 3.0400457091 | 1.4777453607  |
| C | 6.0 | -1.6942516745 | 2.1291272249 | 1.1440153646  |
| C | 6.0 | -2.4231003469 | 2.1544122607 | -0.0600424233 |
| C | 6.0 | -3.4488172568 | 1.2505562928 | -0.3201385134 |
| C | 6.0 | -3.7757298373 | 0.2780247964 | 0.6448177858  |

C 6.0 -3.0735068805 0.2289879261 1.8545752631  
C 6.0 -2.0487811879 1.1412189859 2.0923788078  
O 8.0 0.1530341720 1.6891477047 4.7275161051  
O 8.0 -4.7538027873 -0.6573479395 0.4938968082  
C 6.0 -5.5336918167 -0.6527696311 -0.7034655945  
C 6.0 -0.1986245751 4.1146258207 0.5095493736  
H 1.0 0.8329960463 3.5507434373 2.9865215474  
H 1.0 -2.1806483352 2.9018882780 -0.8168993418  
H 1.0 -3.9842333541 1.3042602663 -1.2666662457  
H 1.0 -3.3256419763 -0.5137472265 2.6119603388  
H 1.0 -6.2429054400 -1.4825130067 -0.5986640854  
H 1.0 -4.9039558346 -0.8277007522 -1.5920016035  
H 1.0 -6.0832912019 0.2972386389 -0.8144241930  
H 1.0 0.6360617460 4.7061749831 0.9095655428  
H 1.0 -1.0379755749 4.7984947019 0.2980928522  
H 1.0 0.1153231332 3.6815597959 -0.4550432938

FRAGNAME=H2ODFT

O1 -4.3173106657 -3.3973887270 0.5240307893  
H2 -3.4794496195 -3.7311415948 0.8023765176  
H3 -4.3577765830 -2.4972880188 0.8052063194

FRAGNAME=H2ODFT

O1 2.1798628313 3.5458059301 5.0426395987  
H2 1.6157833351 2.7914861125 5.1034210826  
H3 2.0540714511 4.0431596679 5.8349111698

EQUILIBRIUM GEOMETRY OF 7-METHOXY-4METHYL COUMARIN WITH TWO WATER  
MOLECULES (MMC-(H<sub>2</sub>O)<sub>2</sub>) IN S<sub>1</sub> STATE

|   |     |               |               |               |
|---|-----|---------------|---------------|---------------|
| O | 8.0 | -1.4449397722 | 1.0621270010  | 3.3137196689  |
| C | 6.0 | -0.3279989809 | 1.9240810461  | 3.6393858974  |
| C | 6.0 | 0.0374235757  | 2.9079339142  | 2.6847197878  |
| C | 6.0 | -0.6202280858 | 3.0734274523  | 1.4422273821  |
| C | 6.0 | -1.6858917692 | 2.1686294291  | 1.1368944176  |
| C | 6.0 | -2.4268574041 | 2.1731328802  | -0.0755307171 |
| C | 6.0 | -3.4448178645 | 1.2491666782  | -0.3193789686 |
| C | 6.0 | -3.7693272526 | 0.2632294971  | 0.6560659230  |
| C | 6.0 | -3.0649999498 | 0.2265695371  | 1.8698135675  |
| C | 6.0 | -2.0560775605 | 1.1496829601  | 2.1194448712  |
| O | 8.0 | 0.1610888707  | 1.6783016147  | 4.7342306741  |
| O | 8.0 | -4.7356562767 | -0.6754001378 | 0.4994208943  |
| C | 6.0 | -5.5311024892 | -0.6826008762 | -0.6903191627 |
| C | 6.0 | -0.2097792648 | 4.1368480992  | 0.4717640421  |
| H | 1.0 | 0.8722771268  | 3.5492124826  | 2.9706084529  |
| H | 1.0 | -2.1942658219 | 2.9153295692  | -0.8385753215 |
| H | 1.0 | -3.9839739319 | 1.2870527817  | -1.2654144965 |
| H | 1.0 | -3.3122802828 | -0.5132563446 | 2.6315045192  |
| H | 1.0 | -6.2314090954 | -1.5167668722 | -0.5708813734 |
| H | 1.0 | -4.9067392348 | -0.8611316844 | -1.5816086369 |
| H | 1.0 | -6.0839973786 | 0.2655830870  | -0.7977096369 |
| H | 1.0 | 0.6252526277  | 4.7303617418  | 0.8706409315  |
| H | 1.0 | -1.0398822729 | 4.8341248971  | 0.2460965787  |
| H | 1.0 | 0.1137610678  | 3.7134035155  | -0.4990261624 |

FRAGNAME=H2ODFT

O1 -4.4294003006 -3.4156928785 0.4100344648

H2 -3.7843352434 -3.9732379190 0.8148962361

H3 -4.3468098592 -2.5670077837 0.8147453283

FRAGNAME=H2ODFT

O1 2.2301970196 3.4614471761 5.2372359641

H2 1.6438355093 2.7251697337 5.1668501613

H3 2.0030849478 3.9139302252 6.0338272339

Natural charges on atoms of 4-Methylumbelliferone and 7-methoxy-4Methyl coumarin in water complexes

|      | 4MU_S0 | 4MU_S1 | MMC_S0 | MMC_S1 |
|------|--------|--------|--------|--------|
| O 1  | -0.519 | -0.531 | -0.526 | -0.517 |
| C 2  | 0.801  | 0.721  | 0.807  | 0.749  |
| C 3  | -0.397 | -0.355 | -0.359 | -0.351 |
| C 4  | 0.084  | -0.068 | 0.056  | -0.051 |
| C 5  | -0.182 | -0.021 | -0.168 | -0.043 |
| C 6  | -0.187 | -0.256 | -0.169 | -0.263 |
| C 7  | -0.308 | -0.246 | -0.326 | -0.240 |
| C 8  | 0.374  | 0.378  | 0.355  | 0.340  |
| C 9  | -0.375 | -0.372 | -0.311 | -0.338 |
| C 10 | 0.376  | 0.385  | 0.381  | 0.414  |



|             |        |        |        |        |
|-------------|--------|--------|--------|--------|
| O 11        | -0.689 | -0.678 | -0.612 | -0.594 |
| O 12        | -0.778 | -0.732 | -0.563 | -0.530 |
| C 13        | -0.722 | -0.712 | -0.282 | -0.286 |
| H 14 (15)   | 0.289  | 0.283  | 0.281  | 0.277  |
| H 15 (16)   | 0.250  | 0.258  | 0.240  | 0.245  |
| H 16 (17)   | 0.282  | 0.284  | 0.244  | 0.245  |
| H 17 (18)   | 0.295  | 0.300  | 0.258  | 0.261  |
| H 18 (C14 ) | 0.624  | 0.630  | -0.681 | -0.676 |
| H 22        | -      | -      | 0.236  | 0.247  |
| H 23        | -      | -      | 0.245  | 0.232  |
| H24         | -      | -      | 0.246  | 0.233  |
| H 19        | 0.261  | 0.243  | 0.236  | 0.247  |
| H 20        | 0.260  | 0.243  | 0.202  | 0.206  |
| H 21        | 0.260  | 0.256  | 0.197  | 0.200  |
